# Supplementary material for: Privileged hydration sites in aromatic side chains: effect on conformational equilibrium
Source: Royal Society of Chemistry journal article supplement (doi:10.1039/c7cp04685e), 2017-01-01
Supplement: c7cp04685e1.pdf [file c7cp04685e1.pdf]

## Supplementary Information

### Privileged hydration sites in aromatic side chains: Effect on conformational equilibrium

Belén Hernández, Fernando Pflüger, Manuel Dauchez, Mahmoud Ghomi

#### This document contains:

|                                                                                                              | Page |
|--------------------------------------------------------------------------------------------------------------|------|
| <b>Table S1.</b> Cartesian coordinates of the geometry optimized Phe and Phe+1W                              | 2    |
| <b>Table S2.</b> Cartesian coordinates of the geometry optimized Tyr and Tyr+3W                              | 3    |
| <b>Table S3.</b> Cartesian coordinates of the geometry optimized Trp and Trp+3W                              | 4    |
| <b>Table S4.</b> Cartesian coordinates of the geometry optimized His <sup>0</sup> and His <sup>0</sup> +3W   | 5    |
| <b>Table S5.</b> Cartesian coordinates of the geometry optimized His <sup>1+</sup> and His <sup>1+</sup> +2W | 6    |

**Table S1.** Cartesian coordinates of the geometry optimized Phe and Phe+1W

| Phenylalanine/continuum <sup>a</sup> |               |               |               | Phenylalanine+1W/continuum <sup>b</sup> |               |               |               |
|--------------------------------------|---------------|---------------|---------------|-----------------------------------------|---------------|---------------|---------------|
| Atom                                 | X             | Y             | Z             | Atom                                    | X             | Y             | Z             |
| N                                    | -0.0929636039 | 0.1346016254  | 0.0768080332  | N                                       | -0.0437588894 | 0.1952227038  | 0.1233063478  |
| C                                    | 0.0036696434  | -0.0232124278 | 1.5775962443  | C                                       | -0.0351816292 | -0.1015014741 | 1.6071729761  |
| C                                    | 1.5316097659  | -0.0768762960 | 1.9099455992  | C                                       | 1.4739316151  | -0.1559093659 | 2.0244508572  |
| O                                    | 2.2893217293  | -0.1835437541 | 0.9073190399  | O                                       | 2.2920295069  | -0.0484591778 | 1.0695726201  |
| C                                    | -0.7216737795 | -1.2943972270 | 2.0508309094  | C                                       | -0.7732653852 | -1.4083490073 | 1.9318033464  |
| C                                    | -2.1936070739 | -1.3332016818 | 1.6944954642  | C                                       | -2.2468197665 | -1.3957797960 | 1.5789303156  |
| C                                    | -2.6692778617 | -2.2294898819 | 0.7305708137  | C                                       | -2.7439578585 | -2.2095457291 | 0.5530879871  |
| C                                    | -3.1067030170 | -0.4644717140 | 2.3091595056  | C                                       | -3.1433472090 | -0.5671097248 | 2.2681246427  |
| C                                    | -4.0220240209 | -2.2569537049 | 0.3830888154  | C                                       | -4.1010662528 | -2.1913756926 | 0.2176044113  |
| C                                    | -4.4559001864 | -0.4905405677 | 1.9654702209  | C                                       | -4.4956827220 | -0.5470383157 | 1.9354968951  |
| C                                    | -4.9180798098 | -1.3862483149 | 0.9982769083  | C                                       | -4.9793087418 | -1.3579639297 | 0.9065902582  |
| H                                    | 0.8819103256  | -0.0760810736 | -0.2386539630 | H                                       | 0.9790973448  | 0.1598313616  | -0.1107582808 |
| H                                    | -0.4385277208 | 0.8605057696  | 2.0336968043  | H                                       | -0.5097279366 | 0.7390618642  | 2.1112988046  |
| H                                    | -0.2169200874 | -2.1721795245 | 1.6359278197  | H                                       | -0.2755712293 | -2.2404262998 | 1.4240125538  |
| H                                    | -0.5874458168 | -1.3342763027 | 3.1337119107  | H                                       | -0.6402088011 | -1.5683007663 | 3.0037764879  |
| H                                    | -1.9812754951 | -2.9222698604 | 0.2561992050  | H                                       | -2.0695747338 | -2.8681002449 | 0.0146487342  |
| H                                    | -2.7618289045 | 0.2327480960  | 3.0661014366  | H                                       | -2.7829205225 | 0.0624106361  | 3.0753416854  |
| H                                    | -4.3710869705 | -2.9607136555 | -0.3641371930 | H                                       | -4.4659198597 | -2.8291184419 | -0.5795490650 |
| H                                    | -5.1487315581 | 0.1853852230  | 2.4541114527  | H                                       | -5.1742582117 | 0.0979784232  | 2.4822709709  |
| H                                    | -5.9686991947 | -1.4058990622 | 0.7319129700  | H                                       | -6.0320938361 | -1.3425491665 | 0.6492715924  |
| H                                    | -0.3257515419 | 1.0877366515  | -0.2013850544 | H                                       | -3.4353056450 | -4.0133240567 | 2.2495109163  |
| H                                    | -0.7714421318 | -0.4928569915 | -0.3586418038 | O                                       | -3.5583852061 | -4.7430458076 | 2.8706251586  |
| O                                    | 1.8283287710  | -0.0278811354 | 3.1159540613  | H                                       | -3.1193057953 | -4.4496856049 | 3.6768778796  |
|                                      |               |               |               | H                                       | -0.4103013934 | 1.1207768641  | -0.0960751299 |
|                                      |               |               |               | H                                       | -0.5625198816 | -0.4863549881 | -0.4316529685 |
|                                      |               |               |               | O                                       | 1.6993125440  | -0.3014016238 | 3.2370992680  |

Unit: angstroms

<sup>a</sup>Corresponding to the lowest energy conformer of Phe ( $g^{\ddagger}$ ,  $\Delta E=0$ ), see for the graphical representation (Fig. 1A, main text).<sup>b</sup>Corresponding to the lowest energy conformer of Phe+1W ( $g^{\ddagger}$ ,  $\Delta E=0$ ), see for the graphical representation (Fig. 1D, main text).

**Table S2.** Cartesian coordinates of the geometry optimized Tyr and Tyr+3W

| Tyrosine/continuum <sup>a</sup> |               |               |               | Tyrosine+3W/continuum <sup>b</sup> |               |               |               |
|---------------------------------|---------------|---------------|---------------|------------------------------------|---------------|---------------|---------------|
| Atom                            | X             | Y             | Z             | Atom                               | X             | Y             | Z             |
| C                               | -0.0492369761 | -0.0619134063 | -0.1371358820 | C                                  | -0.1094636241 | 0.0219608538  | 0.0246420665  |
| H                               | -0.0928217211 | -0.2183473258 | 0.9449704935  | H                                  | -0.1051534306 | 0.0539678767  | 1.1182762321  |
| C                               | 1.3948043213  | -0.055212128  | -0.5939570190 | C                                  | 1.3125665966  | -0.0307778459 | -0.4926257798 |
| C                               | 2.4422305868  | 0.0182265770  | 0.3321381285  | C                                  | 1.5863564385  | -0.3591232067 | -1.8274165950 |
| H                               | 2.2189178979  | 0.0497546489  | 1.3939253843  | H                                  | 0.7706366732  | -0.6000270377 | -2.5016133190 |
| C                               | 3.7748627928  | 0.0342317136  | -0.0755548779 | C                                  | 2.8882064497  | -0.3965959773 | -2.3150682606 |
| C                               | 3.0513853265  | -0.0989476706 | -2.3769188333 | C                                  | 3.7103829796  | 0.2254023513  | -0.1293210144 |
| H                               | 4.5775163279  | 0.0863829056  | 0.6505021194  | H                                  | 3.0801990839  | -0.6583425548 | -3.3492056622 |
| C                               | 4.0812981922  | -0.0236491927 | -1.4342396183 | C                                  | 3.9595206071  | -0.0978620900 | -1.4646431577 |
| H                               | 3.2860233804  | -0.1493765437 | -3.4352567205 | H                                  | 4.5397897758  | 0.4598816416  | 0.5278772326  |
| O                               | 5.4036773897  | -0.0075724660 | -1.7884896674 | O                                  | 5.2550633007  | -0.1127105589 | -1.8936124614 |
| H                               | 5.4913863561  | -0.0673399081 | -2.7474904324 | H                                  | 5.3218954191  | -0.3347513184 | -2.8513093955 |
| H                               | -0.5964781457 | -0.8875303662 | -0.5969592341 | H                                  | -0.6576452402 | -0.8775638915 | -0.2630752677 |
| C                               | 1.7260643516  | -0.1141545233 | -1.9539723864 | O                                  | 5.5187411807  | -0.7063166657 | -4.5393691964 |
| H                               | 0.9409053429  | -0.1799867153 | -2.7001888956 | H                                  | 5.8939373403  | -0.0138125996 | -5.0968516054 |
| C                               | -0.8286600697 | 1.2165989164  | -0.4920576748 | H                                  | 6.0077519171  | -1.5084423460 | -4.7599310570 |
| H                               | -0.8606338723 | 1.3570160652  | 1.5708276877  | H                                  | 6.7927761354  | -0.5196862104 | -0.8680057728 |
| N                               | -0.1718855289 | 2.4359029248  | 0.1138332201  | O                                  | 7.5916542861  | -0.7718993598 | -0.3729023320 |
| H                               | -0.133720193  | 3.2210644922  | -0.5358397633 | H                                  | 7.9493543457  | 0.0579455492  | -0.0401274577 |
| H                               | -0.8201334428 | 2.6846404261  | 0.8948356246  | O                                  | 3.6497514522  | -3.0805497454 | 1.0159451325  |
| H                               | 0.7767463661  | 2.2621511555  | 0.4512746403  | H                                  | 3.5441283744  | -2.1720590089 | 0.7035074352  |
| C                               | -2.2831559375 | 1.1775633789  | 0.0799818456  | H                                  | 4.5925536451  | -3.2581744636 | 0.9237493868  |
| O                               | -2.5009125594 | 1.9746383011  | 1.0329391692  | C                                  | 2.3973517944  | 0.2567010056  | 0.3436428886  |
| O                               | -3.0540474969 | 0.3569448868  | -0.4473697222 | H                                  | 2.2238769466  | 0.4992233116  | 1.3874799836  |
|                                 |               |               |               | C                                  | -0.9307407807 | 1.2089646548  | -0.5082055957 |
|                                 |               |               |               | H                                  | -0.9837399005 | 1.1803294158  | -1.5951019956 |
|                                 |               |               |               | N                                  | -0.3022165980 | 2.5244349649  | -0.1090614871 |
|                                 |               |               |               | H                                  | -0.3014048708 | 3.2028632697  | -0.8702977166 |
|                                 |               |               |               | H                                  | -0.9455603700 | 2.8690570429  | 0.6395678383  |
|                                 |               |               |               | H                                  | 0.6568117590  | 2.4348731194  | 0.2313787941  |
|                                 |               |               |               | C                                  | -2.3743750430 | 1.2188942975  | 0.0929333660  |
|                                 |               |               |               | O                                  | -2.5981399923 | 2.1432919689  | 0.9215369668  |
|                                 |               |               |               | O                                  | -3.1302162105 | 0.3096156505  | -0.2907710735 |

Unit: angstroms

<sup>a</sup>Corresponding to the lowest energy conformer of Tyr (g·g,  $\Delta E=0$ ), see for graphical representation (Fig. 4A, main text).<sup>b</sup>Corresponding to the lowest energy conformer of Tyr+3W (g·g,  $\Delta E=0$ ), see for graphical representation (Fig. 4G, main text).

**Table S3.** Cartesian coordinates of the geometry optimized Trp and Trp+3W

| Tryptophan/continuum <sup>a</sup> |               |               |               | Tryptophan+3W/continuum <sup>b</sup> |               |               |               |
|-----------------------------------|---------------|---------------|---------------|--------------------------------------|---------------|---------------|---------------|
| Atom                              | X             | Y             | Z             | Atom                                 | X             | Y             | Z             |
| N                                 | -0.2280204702 | -0.1443876275 | -0.9283624445 | N                                    | 0.1902082803  | -1.1803627889 | -0.5655905069 |
| H                                 | 0.7928905956  | -0.1778071509 | -0.8524959664 | H                                    | 0.4676516865  | -1.5504848304 | 0.3475925595  |
| H                                 | -0.4642863720 | 0.2381463055  | -1.8437286539 | H                                    | 0.6948922382  | -1.7017833008 | -1.2819542246 |
| H                                 | -0.6548219041 | 0.4684268455  | -0.2030238074 | H                                    | 0.4281122678  | -0.1701941951 | -0.6668470095 |
| C                                 | -0.8695494699 | -1.4868153506 | -0.6831210374 | C                                    | -1.3039054139 | -1.2092197525 | -0.7740519658 |
| C                                 | -2.1674784870 | -1.2157176847 | 0.1395898518  | C                                    | -1.6828462707 | 0.1457687160  | -1.4497879201 |
| O                                 | -2.2486956307 | -0.0623953452 | 0.6424097044  | O                                    | -0.7739657068 | 1.0201949524  | -1.4384168725 |
| O                                 | -2.9604941877 | -2.1700981201 | 0.2342710204  | O                                    | -2.8405742480 | 0.2247485109  | -1.8983810736 |
| C                                 | 0.1004029375  | -2.4036124797 | 0.0928797202  | C                                    | -2.0267127914 | -1.3841761167 | 0.5782708084  |
| H                                 | 0.2581303366  | -1.9856507110 | 1.0921645553  | H                                    | -1.8328234508 | -0.5036785009 | 1.1988358662  |
| H                                 | -0.4207769937 | -3.3541369133 | 0.2295666806  | H                                    | -3.0965917068 | -1.3817743325 | 0.3568256919  |
| H                                 | -1.1191970328 | -1.9198249730 | -1.6496495708 | H                                    | -1.5326195844 | -2.0373003567 | -1.4419012604 |
| C                                 | 1.4243753420  | -2.6058872122 | -0.5829162936 | C                                    | -1.6318838021 | -2.6251809827 | 1.3226945561  |
| C                                 | 1.6974621591  | -3.3808928143 | -1.7706621092 | C                                    | -1.9777730753 | -3.9886023789 | 1.0008970415  |
| C                                 | 2.6279619354  | -2.0684562877 | -0.1873295472 | C                                    | -0.8472154960 | -2.6849960578 | 2.4525091809  |
| C                                 | 3.0906271183  | -3.2653158008 | -2.0320975313 | C                                    | -1.3616279034 | -4.8147328897 | 1.9822502057  |
| C                                 | 0.9096340069  | -4.1711010474 | -2.6265037603 | C                                    | -2.7630654465 | -4.5879849289 | 0.0000960812  |
| H                                 | 2.8546801973  | -1.4465460127 | 0.6656933841  | H                                    | -0.4002114214 | -1.8801495378 | 3.0175723509  |
| N                                 | 3.6269674238  | -2.4598745267 | -1.051147444  | N                                    | -0.6924235483 | -3.9918387156 | 2.8622682315  |
| C                                 | 3.7027940765  | -3.9045573911 | -3.1147167833 | C                                    | -1.4980957866 | -6.2070432030 | 1.9735873459  |
| C                                 | 1.5145819072  | -4.8088088209 | -3.7012153924 | C                                    | -2.9061344284 | -5.9688731076 | -0.0075031634 |
| H                                 | -0.1542669888 | -4.2886581404 | -2.4520756913 | H                                    | -3.2578155034 | -3.9854591066 | -0.7537088138 |
| H                                 | 4.5976215241  | -2.2015239216 | -0.9678347673 | H                                    | -0.0952962955 | -4.2979143653 | 3.6320264280  |
| C                                 | 2.8973427272  | -4.6748007831 | -3.9437437104 | C                                    | -2.2756350092 | -6.7717407638 | 0.9678346881  |
| H                                 | 4.7664852105  | -3.8046303305 | -3.2981611905 | H                                    | -1.0192760855 | -6.8238815339 | 2.7252009341  |
| H                                 | 0.9172214308  | -5.4219213632 | -4.3665487046 | H                                    | -3.5093107983 | -6.4427418695 | -0.7734450132 |
| H                                 | 3.3404009526  | -5.1848535330 | -4.7916051583 | H                                    | -2.3950688668 | -7.8486859589 | 0.9287864501  |
|                                   |               |               |               | H                                    | 0.7385242058  | -4.7829680884 | 5.9565847750  |
|                                   |               |               |               | O                                    | 1.0088171793  | -4.9061226413 | 5.0390555542  |
|                                   |               |               |               | H                                    | 1.9567058149  | -4.7288380412 | 5.0279529772  |
|                                   |               |               |               | H                                    | -2.6883289068 | -3.8360680133 | 4.4888370340  |
|                                   |               |               |               | O                                    | -3.5220864676 | -4.0376764693 | 4.9294112417  |
|                                   |               |               |               | H                                    | -3.9441957981 | -4.7089567293 | 4.3605628119  |
|                                   |               |               |               | H                                    | -4.0847408331 | -6.2837827223 | 2.5825257006  |
|                                   |               |               |               | O                                    | -4.7062506155 | -6.0342889027 | 3.2824898958  |
|                                   |               |               |               | H                                    | -5.5253778211 | -5.8112113347 | 2.8250064060  |

Unit: angstroms

<sup>a</sup>Corresponding to the lowest energy conformer of Trp (g<sup>-</sup>g<sup>+</sup>, ΔE=0), see for graphical representation (Fig. 6A, main text).<sup>b</sup>Corresponding to the lowest energy conformer of Trp+3W (g<sup>-</sup>g<sup>+</sup>, ΔE=0), see for graphical representation (Fig. 6G, main text).

**Table S4.** Cartesian coordinates of the geometry optimized His<sup>0</sup> and His<sup>0</sup>+3W

| Histidine/continuum <sup>a</sup> |               |               |               | Histidine+3W/continuum <sup>b</sup> |               |               |               |
|----------------------------------|---------------|---------------|---------------|-------------------------------------|---------------|---------------|---------------|
| Atom                             | X             | Y             | Z             | Atom                                | X             | Y             | Z             |
| C                                | -0.0505974713 | -0.0461649347 | -0.0942542376 | C                                   | -0.1201859741 | -0.0434645973 | 0.0232131535  |
| H                                | -0.1049219134 | -0.1182479666 | 0.9986110883  | C                                   | -0.1065838646 | 0.0637373867  | 1.3951893450  |
| C                                | 1.3837464582  | -0.0083079087 | -0.5277207311 | H                                   | 0.7026549453  | 0.1855160627  | 2.0961856826  |
| C                                | 2.1095928582  | -0.9139567732 | -1.2572893848 | N                                   | -1.4228550391 | 0.0131121732  | 1.7963692378  |
| H                                | 1.8488125143  | -1.8597558025 | -1.7009699938 | H                                   | -1.7668408230 | 0.0587562332  | 2.7610161570  |
| N                                | 3.3779138088  | -0.3818316663 | -1.3517322073 | C                                   | -2.1808727073 | -0.1252834273 | 0.6867715809  |
| C                                | 3.3829294488  | 0.8050198471  | -0.6985219548 | N                                   | -1.4322259799 | -0.1657571605 | 0.4031823872  |
| N                                | 2.1950485270  | 1.0628189391  | -0.1837685336 | C                                   | 1.0408587825  | -0.0208154371 | -0.9283399204 |
| H                                | -0.5412291140 | -0.9326266302 | -0.4966558624 | H                                   | 1.9467055679  | -0.3193203990 | -0.3996281918 |
| H                                | 4.2583403849  | 1.4309217108  | -0.6275945571 | H                                   | 0.8843733758  | -0.7556127258 | -1.7244867731 |
| C                                | -0.8677648283 | 1.1780450391  | -0.5487757209 | H                                   | -3.2564233860 | -0.2014849451 | 0.7160329084  |
| H                                | -0.8945251513 | 1.2309892072  | -1.6360997390 | H                                   | -1.8043056958 | -0.2082881376 | -2.1327882912 |
| N                                | -0.2208370872 | 2.4444876519  | -0.0405973810 | O                                   | -1.7642879156 | 0.0098017349  | -3.1032373736 |
| H                                | -0.3615798981 | 3.2234712616  | -0.6833246295 | H                                   | -1.6425341026 | -0.8237851209 | -3.5709666529 |
| H                                | -0.7247281193 | 2.6698677594  | 0.8334686981  | H                                   | -2.6462316401 | -0.6212588127 | 4.9703059757  |
| H                                | 0.8016183675  | 2.3061127454  | 0.1006328165  | O                                   | -2.3313964511 | 0.1694662721  | 4.5165925003  |
| C                                | -2.3168003450 | 1.1267431540  | 0.0264352358  | H                                   | -2.9383112219 | 0.8720623672  | 4.7778604904  |
| O                                | -2.5424055935 | 1.9117218425  | 0.9843811401  | O                                   | 0.3446432718  | -3.3667766968 | 1.3060180435  |
| O                                | -3.0799540795 | 0.2949975313  | -0.5024181136 | H                                   | 0.4341714145  | -3.7344854469 | 0.4195958864  |
| H                                | 4.1663296191  | -0.8023609641 | -1.8219807054 | H                                   | 0.2687300986  | -2.4127592411 | 1.1656110865  |
|                                  |               |               |               | C                                   | 1.3596350338  | 1.3473758055  | -1.5515525652 |
|                                  |               |               |               | H                                   | 1.4363849470  | 2.0973053392  | -0.7632086434 |
|                                  |               |               |               | N                                   | 0.3044320731  | 1.8273888183  | -2.5187689218 |
|                                  |               |               |               | H                                   | -0.2238425326 | 2.6230397747  | -2.1646553869 |
|                                  |               |               |               | H                                   | 0.8706129157  | 2.1182976338  | -3.3447276296 |
|                                  |               |               |               | H                                   | -0.3796341950 | 1.0974121735  | -2.8179670554 |
|                                  |               |               |               | C                                   | 2.7187098659  | 1.3536408959  | -2.3362370218 |
|                                  |               |               |               | O                                   | 2.6572721453  | 1.8091409473  | -3.5102970375 |

Unit: angstroms

<sup>a</sup>Corresponding to the lowest energy conformer of His<sup>0</sup>(NεH) (g<sup>g</sup><sup>+</sup>, ΔE=0), see for graphical representation (Fig. 8A, main text).<sup>b</sup>Corresponding to the lowest energy conformer of His<sup>0</sup>(NεH) (g<sup>g</sup><sup>+</sup>, ΔE=0), see for graphical representation (Fig. 9A, main text).

**Table S5.** Cartesian coordinates of the geometry optimized His<sup>1+</sup> and His<sup>1+</sup>+3W

| Protonated histidine/continuum <sup>a</sup> |               |               |               | Protonated histidine+2W/continuum <sup>b</sup> |               |               |               |
|---------------------------------------------|---------------|---------------|---------------|------------------------------------------------|---------------|---------------|---------------|
| Atom                                        | X             | Y             | Z             | Atom                                           | X             | Y             | Z             |
| C                                           | 0.0157644042  | 0.0174534010  | 0.0555004127  | C                                              | -0.1964057745 | -0.0076339142 | -0.0738968252 |
| H                                           | 0.0191387566  | 0.0515984748  | 1.1467678585  | C                                              | -0.1268305498 | 0.0240734679  | 1.2925231477  |
| C                                           | 1.4455281020  | 0.0024113912  | -0.3850753758 | H                                              | 0.7251925089  | 0.0576978412  | 1.9497014925  |
| C                                           | 2.6015120194  | -0.1655342820 | 0.3214942107  | N                                              | -1.4172911212 | -0.0284999323 | 1.7725726716  |
| H                                           | 2.7763738165  | -0.3051752322 | 1.3735419426  | H                                              | -1.6944463322 | -0.0299982504 | 2.7704582114  |
| N                                           | 3.6313197135  | -0.1358193619 | -0.5982555022 | C                                              | -2.2580869961 | -0.0960445591 | 0.7430506971  |
| C                                           | 3.1331610362  | 0.0503795247  | -1.8237155343 | N                                              | -1.5481370210 | -0.0824098149 | -0.3833051133 |
| N                                           | 1.8129535369  | 0.1297957331  | -1.7110822531 | C                                              | 0.9045405701  | 0.0132142064  | -1.0890295844 |
| H                                           | -0.4675793881 | -0.9213779100 | -0.2350210234 | H                                              | 1.8133015962  | -0.3546574882 | -0.6088848952 |
| H                                           | 3.7046240618  | 0.1265652685  | -2.7323265452 | H                                              | 0.6760949984  | -0.6740706563 | -1.9047629747 |
| C                                           | -0.8031499437 | 1.2074340275  | -0.4841801922 | H                                              | -3.3309497576 | -0.1561348770 | 0.8086287786  |
| H                                           | -0.2238369608 | 2.1289883714  | -0.4072326205 | H                                              | -1.9713764877 | -0.1595049667 | -1.3349925794 |
| N                                           | -2.0387887911 | 1.4161340063  | 0.3548025489  | H                                              | -2.4405010022 | -0.8292755072 | 4.8765202110  |
| H                                           | -1.9155631737 | 2.1125588085  | 1.0901881633  | O                                              | -2.0613119932 | -0.0363622590 | 4.4786552168  |
| H                                           | -2.7559659684 | 1.7220964081  | -0.3373108081 | H                                              | -2.5464868536 | 0.7044882941  | 4.8613583361  |
| H                                           | -2.3739778754 | 0.5531313117  | 0.7877950921  | H                                              | -1.9114075734 | 0.3276069713  | -3.3425256635 |
| C                                           | -1.3149972018 | 1.0969811019  | -1.9673145562 | O                                              | -2.6550616563 | -0.1456399845 | -2.9044355865 |
| O                                           | -2.5024496655 | 1.4396220268  | -2.1427069168 | H                                              | -2.7533285457 | -0.9872489010 | -3.3639226563 |
| O                                           | -0.4885766465 | 0.7129631512  | -2.8301665642 | C                                              | 1.2010473462  | 1.3788425495  | -1.7372033496 |
| H                                           | 4.6155243322  | -0.2333406434 | -0.3861072472 | H                                              | 2.0871641397  | 1.2653883500  | -2.3617199962 |
| H                                           | 1.0735488004  | 0.3315401537  | -2.4267874082 | N                                              | 1.5179917116  | 2.4495103929  | -0.7239353994 |
|                                             |               |               |               | H                                              | 2.5168034001  | 2.6201018825  | -0.6087415946 |
|                                             |               |               |               | H                                              | 1.0371000252  | 3.2926939014  | -1.1055418155 |
|                                             |               |               |               | H                                              | 1.1183874033  | 2.2530507625  | 0.1970614822  |
|                                             |               |               |               | C                                              | 0.0729957962  | 1.9581991626  | -2.6524656822 |
|                                             |               |               |               | O                                              | -0.2140244109 | 3.1600937107  | -2.4598741001 |
|                                             |               |               |               | O                                              | -0.3916505774 | 1.1625662296  | -3.5001595550 |

Unit: angstroms

<sup>a</sup>Corresponding to the lowest energy conformer of His<sup>1+</sup>(NεH) (tg, ΔE=0), see for graphical representation (Fig. 11A, main text).<sup>b</sup>Corresponding to the lowest energy conformer of His<sup>1+</sup>(NεH) (g<sup>+</sup>g<sup>+</sup>, ΔE=0), see for graphical representation (Fig. 11G, main text).
